# Supplementary material for: Recovery of consolidation after sleep following experimental stroke – interaction of slow waves, spindles and GABA
Source: bioRxiv or medRxiv preprint supplement (doi:10.1101/2021.01.21.427707), 2021-11-24
Supplement: Supplementary file [file media-1.pdf]

## SUPPLEMENTARY INFORMATION

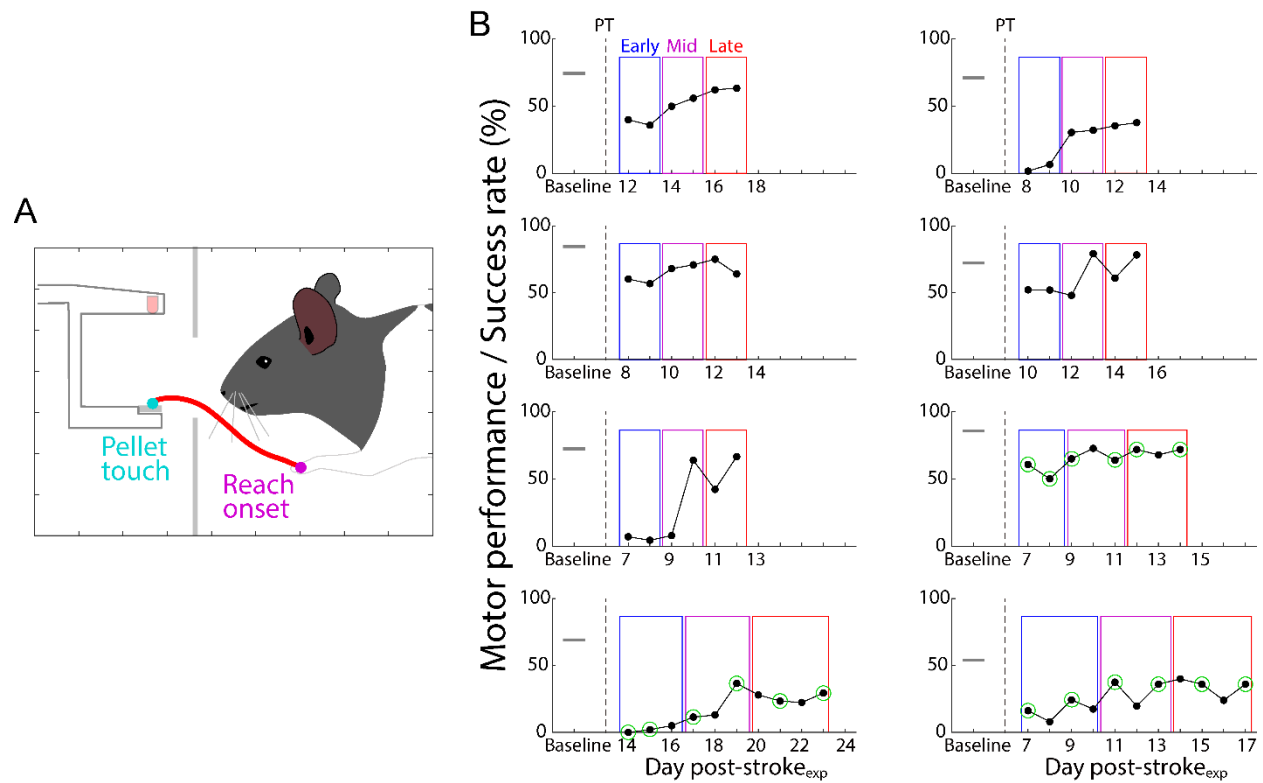

**Figure S1. Reach-to-grasp task and success rates over all recovery periods.**

**(A)**, Cartoon example of reach-to-grasp motor task with lateral view. Magenta and cyan dots represents reach onset and pellet touch position, respectively. Red trace represents an example of mean trajectory within a single session.

**(B)**, Pellet retrieval success rates in an individual animal ( $n=8$  rats). Three colored boxes represents the presumed tertile recovery periods after induction of PT stroke<sub>exp</sub>. In three rats in which motor recovery was monitored more than 6 days, we used two representative sessions per period (green circles).

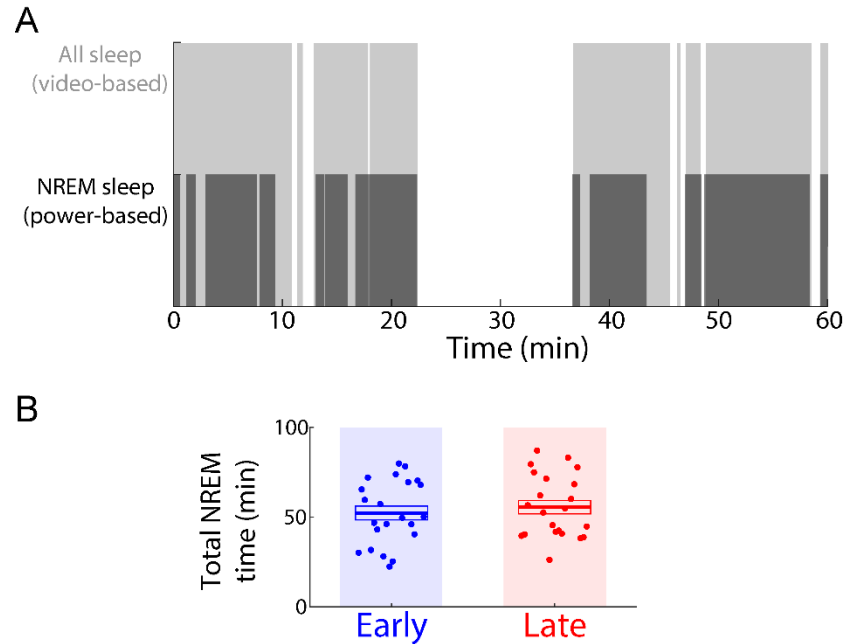

**Figure S2. Sleep detection and NREM sleep duration.**

(A), Examples of detections of all sleep using a degree of movement (gray; see Methods) and NREM sleep using power spectral density in 0.1-4 Hz and gamma (30-60 Hz) bands (black).

(B), Mean NREM sleep time during early and late period after stroke. NREM sleep time across all sessions:  $52.2 \pm 3.9$  min during early period ( $n = 28$  sessions in 14 rats),  $55.5 \pm 3.7$  min during late period ( $n = 28$  sessions in 14 rats). No significant difference; early vs. late: mixed-effects model,  $t_{54} = 0.93$ ,  $P = 0.36$ . Mean in solid line  $\pm$  s.e.m. in box.

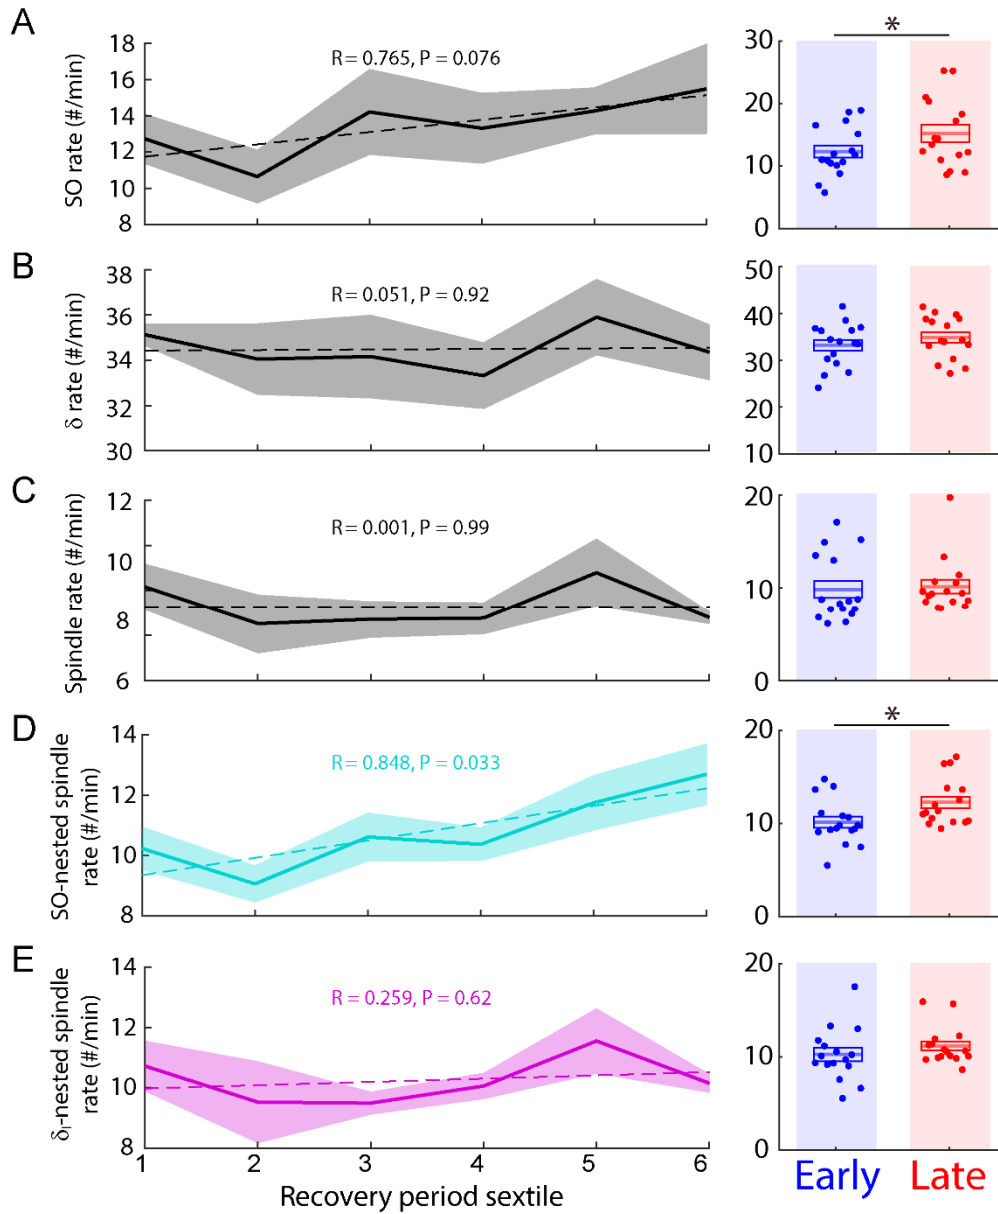

**Figure S3. Sleep waves rates over the recovery period.**

Left, average time courses in the rates of SO (A),  $\delta$ -waves (B), spindles (C), SO-nested spindles (D), and  $\delta$ -nested spindles (E) over the recovery period sextile ( $n = 11$  rats). Dashed line represents linear fitting (linear regression; SO:  $R = 0.765, P = 0.076$ ;  $\delta$ :  $R = 0.051, P = 0.92$ ; spindles:  $R = 0.001, P = 0.99$ ; SO-nested spindles:  $R = 0.848, P = 0.033$ ;  $\delta$ -nested spindles:  $R = 0.259, P = 0.62$ ). Right, comparisons between early period and late period in each corresponding metric (early vs. late, mixed-effect model; SO:  $t_{30} = 2.21, *P = 0.035$ ;  $\delta$ -waves:  $t_{30} = 1.65, P = 0.11$ ; spindles:  $t_{30} = 0.28, P = 0.77$ ; SO-nested spindle:  $t_{30} = 2.52, *P = 0.017$ ;  $\delta$ -nested spindles:  $t_{30} = 1.18, P = 0.25$ ). Mean in solid line  $\pm$  s.e.m. in box.

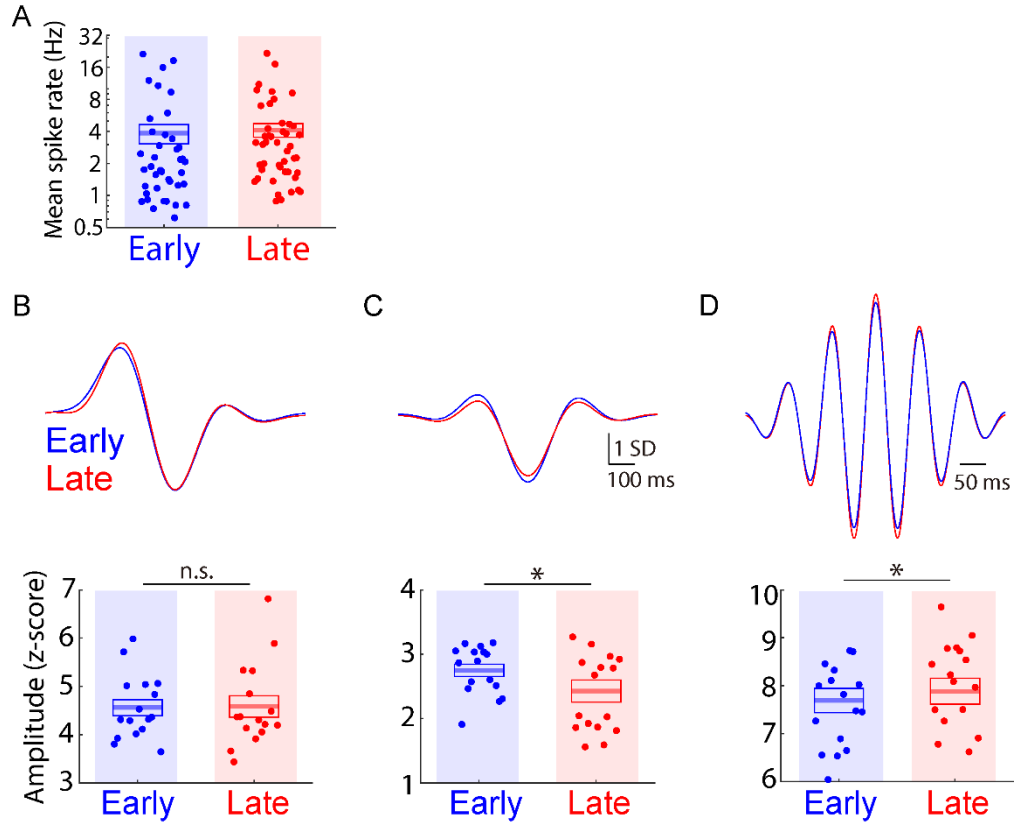

**Figure S4. Spike activity and Sleep waves amplitude.**

(A), Mean spike rates of units during NREM sleep for early period and late period after stroke<sub>exp</sub>. There was a similar activity for both periods (mixed-effects model,  $t_{97} = -0.29$ ,  $P = 0.77$ ).

(B-D), Top, averages of event-triggered LFPs of SO (B),  $\delta_i$  (C), and SO-nested spindles (D) for early period (blue;  $n = 16$  sessions, 8 rats) and late period after stroke<sub>exp</sub> (red;  $n = 16$  sessions, 8 rats). LFP was normalized; subtracting by the mean and dividing by the standard deviation in each sleep session. Bottom, mean peak-to-trough amplitude corresponding to top. There were significant changes for  $\delta_i$  and SO-nested spindles from early period to late period (SO: mixed-effects model,  $t_{30} = 0.13$ ,  $P = 0.90$ ;  $\delta_i$ : mixed-effects model,  $t_{30} = -2.60$ ,  $*P = 0.014$ ; SO-nested spindles: mixed-effects model,  $t_{30} = 2.26$ ,  $*P = 0.031$ ). Mean in solid line  $\pm$  s.e.m. in box.

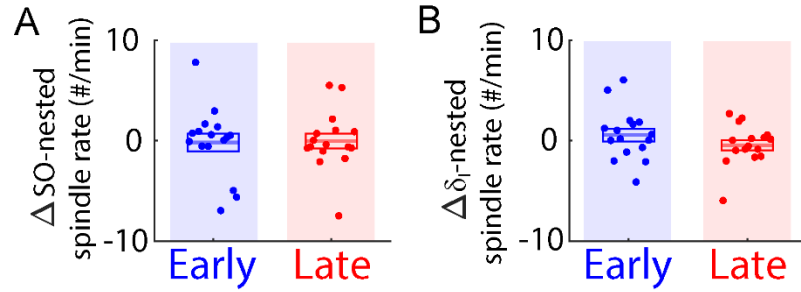

**Figure S5. Changes in spindles' rates within a single session**

Changes of rates in the SO-nested spindles (**A**) and the  $\delta_I$ -nested spindles (**B**) within a single session (i.e., from pre-training to post-training sleep) in each column of the two recovery periods.  $\Delta$ SO-nested spindles (early,  $n = 16$  sessions in 8 rats,  $-0.60 \pm 0.45\%$  vs. late,  $n = 16$  sessions in 8 rats,  $0.33 \pm 0.61\%$ , mixed-effects model,  $t_{30} = 1.27$ ,  $P = 0.21$ ).  $\Delta\delta_I$ -nested spindles (early,  $n = 16$  sessions in 8 rats,  $0.56 \pm 0.63\%$  vs. late,  $n = 16$  sessions in 8 rats,  $-0.43 \pm 0.50\%$ , mixed-effects model,  $t_{30} = -1.34$ ,  $P = 0.19$ ). Mean in solid line  $\pm$  s.e.m. in box.

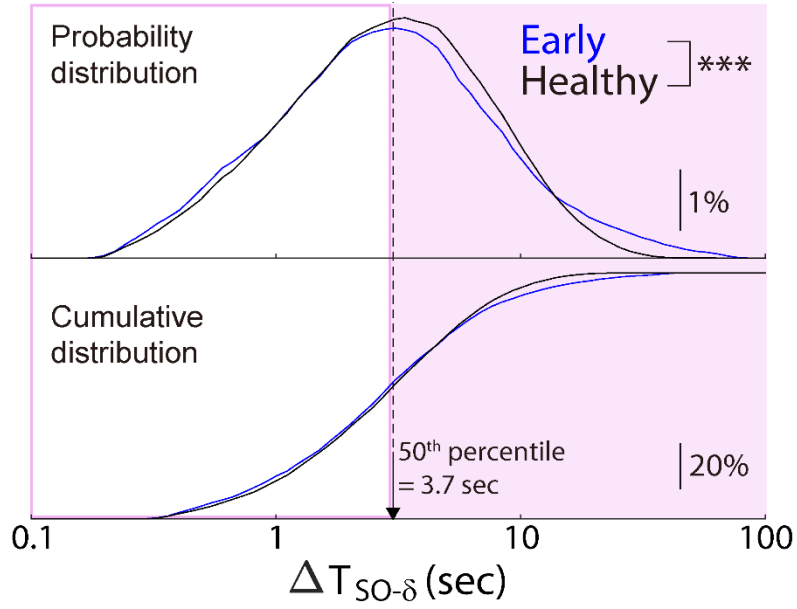

**Figure S6. Redistribution of  $\delta_i$ -waves relative to SO after  $\text{stroke}_{\text{exp}}$  in the same animal.**

Example distributions of  $\Delta T_{\text{SO}-\delta}$  are shown for sleep sessions in the early recovery (blue;  $n = 1$  rats) and sleep sessions in the intact brain before inducing ET-1  $\text{stroke}_{\text{exp}}$  in the same rat. (black;  $n = 1$  rat; Kolmogorov-Smirnov test, KS-statistic = 0.18, \*\*\* $P < 10^{-9}$ ).

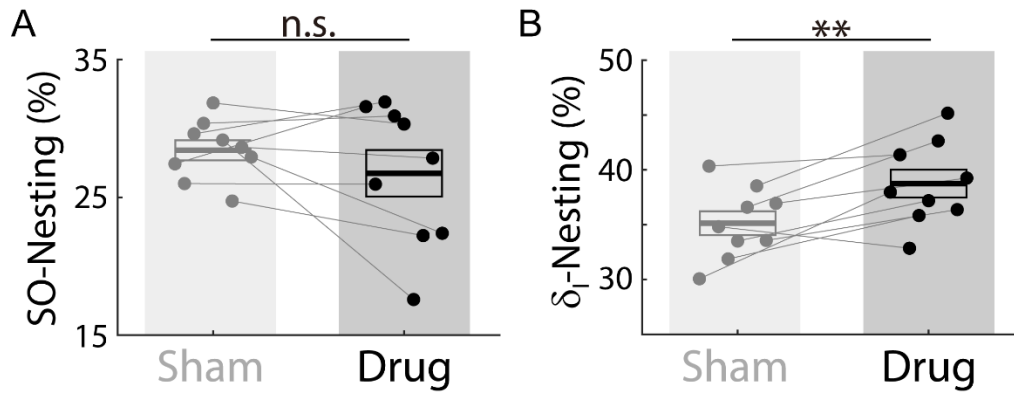

**Figure S7. Blocking GABA<sub>A</sub>  $\alpha 5$ -subtype receptor in healthy animals.**

Comparison of the drug (L655,708) effect on SO-Nesting (**A**) and  $\delta_I$ -Nesting (**B**) in healthy animals. SO-Nesting was not changed while  $\delta_I$ -Nesting was stronger, with the drug compared to the sham (SO-Nesting: sham,  $n = 9$  sessions,  $28.4 \pm 0.73\%$  vs. drug,  $n = 9$  sessions,  $26.8 \pm 1.7\%$ , mixed-effects model,  $t_{16} = -1.14$ ,  $P = 0.27$ ;  $\delta_I$ -Nesting: sham,  $35.2 \pm 1.1\%$  vs. drug,  $38.7 \pm 1.3\%$ , mixed-effects model,  $t_{16} = 3.59$ ,  $**P < 10^{-2}$ ).

|                                      | Rat ID | Figures 1, 2, 3, 5, and 6              |       |        |      | Figure 1       | Figure 7                                     |      |      | Figure 4                               |                |
|--------------------------------------|--------|----------------------------------------|-------|--------|------|----------------|----------------------------------------------|------|------|----------------------------------------|----------------|
|                                      |        | stroke <sub>exp</sub> + motor training |       |        |      | Healthy        | stroke <sub>exp</sub> + spontaneous recovery |      |      | stroke <sub>exp</sub> + motor training |                |
|                                      |        | Baseline                               | Early | Middle | Late |                | Baseline                                     | Sham | Drug | Sleep                                  | No-sleep       |
| Contribution<br>(number of sessions) | 1      | 2 <sup>#</sup>                         | 2     | 2      | 2    | -              | -                                            | -    | -    | -                                      | -              |
|                                      | 2      | 2 <sup>#</sup>                         | 2     | 2      | 2    | -              | -                                            | -    | -    | -                                      | -              |
|                                      | 3      | 2 <sup>#</sup>                         | 2     | 2      | 2    | -              | -                                            | -    | -    | -                                      | -              |
|                                      | 4      | 2 <sup>#</sup>                         | 2     | 2      | 2    | -              | -                                            | -    | -    | -                                      | -              |
|                                      | 5      | 2 <sup>#</sup>                         | 2     | 2      | 2    | -              | -                                            | -    | -    | -                                      | -              |
|                                      | 6      | 2 <sup>#</sup>                         | 2     | 2      | 2    | -              | -                                            | -    | -    | -                                      | -              |
|                                      | 7      | 2 <sup>#</sup>                         | 2     | 2      | 2    | -              | -                                            | -    | -    | 5                                      | -              |
|                                      | 8      | 2 <sup>#</sup>                         | 2     | 2      | 2    | -              | -                                            | -    | -    | 5                                      | -              |
|                                      | 9      | -                                      | -     | -      | -    | 2 <sup>*</sup> | 2 <sup>*</sup>                               | 3    | 3    | -                                      | -              |
|                                      | 10     | -                                      | -     | -      | -    | 2 <sup>*</sup> | 2 <sup>*</sup>                               | 3    | 3    | -                                      | -              |
|                                      | 11     | -                                      | -     | -      | -    | 2 <sup>*</sup> | 2 <sup>*</sup>                               | 3    | 3    | -                                      | -              |
|                                      | 12     | -                                      | -     | -      | -    | -              | -                                            | 3    | 3    | -                                      | -              |
|                                      | 13     | -                                      | -     | -      | -    | -              | -                                            | 3    | 3    | -                                      | -              |
|                                      | 14     | -                                      | -     | -      | -    | -              | -                                            | 2    | 2    | -                                      | -              |
|                                      | 15     | -                                      | -     | -      | -    | 2              | -                                            | -    | -    | -                                      | -              |
|                                      | 16     | -                                      | -     | -      | -    | 1              | -                                            | -    | -    | -                                      | -              |
|                                      | 17     | -                                      | -     | -      | -    | -              | -                                            | -    | -    | 6 <sup>#</sup>                         | -              |
|                                      | 18     | -                                      | -     | -      | -    | -              | -                                            | -    | -    | 5 <sup>#</sup>                         | -              |
|                                      | 19     | -                                      | -     | -      | -    | -              | -                                            | -    | -    | 5 <sup>#</sup>                         | -              |
|                                      | 20     | -                                      | -     | -      | -    | -              | -                                            | -    | -    | 4 <sup>#</sup>                         | -              |
|                                      | 21     | -                                      | -     | -      | -    | -              | -                                            | -    | -    | -                                      | 6 <sup>#</sup> |
|                                      | 22     | -                                      | -     | -      | -    | -              | -                                            | -    | -    | -                                      | 4 <sup>#</sup> |
|                                      | 23     | -                                      | -     | -      | -    | -              | -                                            | -    | -    | -                                      | 4 <sup>#</sup> |
|                                      | 24     | -                                      | -     | -      | -    | -              | -                                            | -    | -    | -                                      | 2 <sup>#</sup> |
|                                      | 25     | -                                      | -     | -      | -    | -              | -                                            | -    | -    | -                                      | 3 <sup>#</sup> |
|                                      | 26     | -                                      | -     | -      | -    | -              | -                                            | -    | -    | -                                      | 4 <sup>#</sup> |
|                                      | 27     | -                                      | -     | -      | -    | -              | -                                            | -    | -    | -                                      | 3 <sup>#</sup> |
|                                      | 28     | -                                      | -     | -      | -    | -              | -                                            | -    | -    | -                                      | 2 <sup>#</sup> |
| Total                                |        | 16                                     | 16    | 16     | 16   | 9              | 6                                            | 17   | 17   | 29                                     | 28             |

**Table S1. The number of sessions contributed by each rat to the respective experiment types.**

All numbers indicate independent contributions to each condition except the numbers marked by star; \* indicate the same session that is counted for two conditions. # indicates the sessions in which electrophysiology was not monitored. Rat 9-16 was monitored only for sleep without behavior tasks. Stroke<sub>exp</sub> models: photothrombotic/PT for Rat 1-8, 12-14, and 17-28, and ET-1 induced for Rat 9-11.
